# Supplementary material
Source: PubMed Central journal article supplement (PMC6467699)
Supplement: NIHMS1016193-supplement-1.pdf [file NIHMS1016193-supplement-1.pdf]

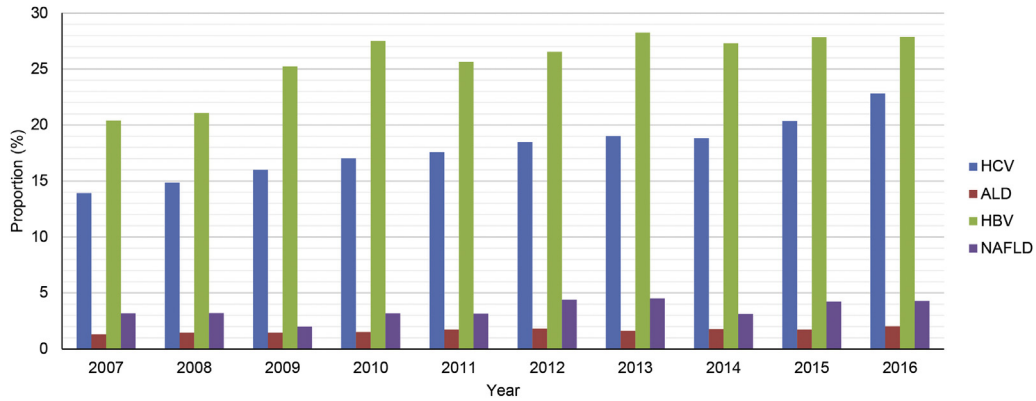

**Supplementary Figure 1.** Annual trends in proportion of HCC-related death among subjects with liver-related mortality based on etiology of chronic liver disease.

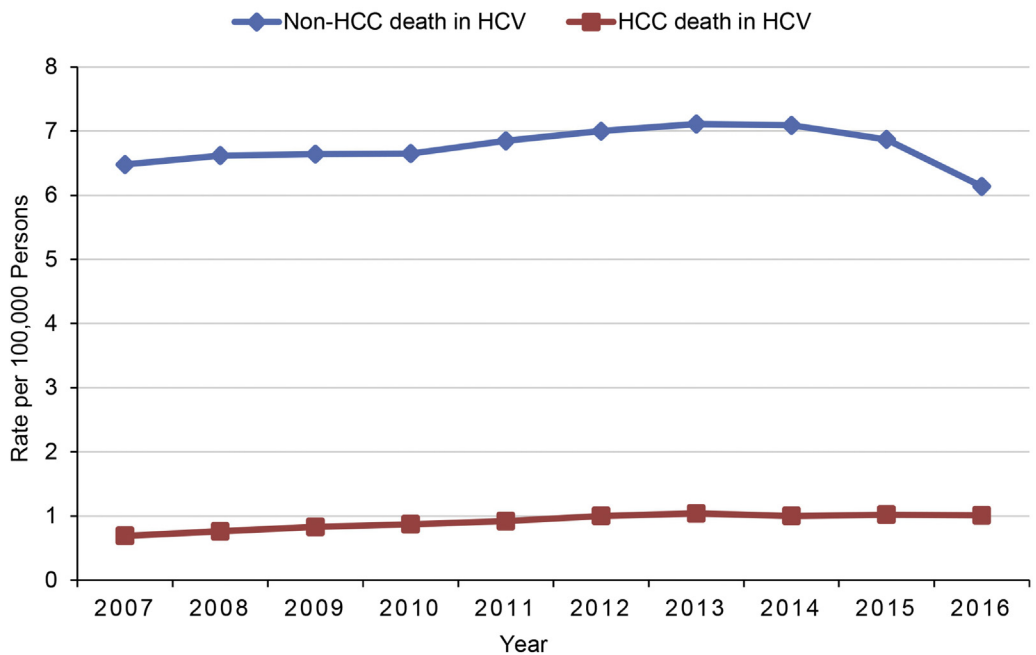

**Supplementary Figure 2.** Age-standardized hepatitis C virus-related mortality rate according to presence of HCC as the underlying cause of death among US adults  $\geq 20$  years between 2007 and 2016.

**Supplementary Table 1.** Annual Trends in Proportion of Liver-Related Deaths According to Etiology of Chronic Liver Disease

| Proportion of liver-related deaths, % | Average APC (95% CI) | Trend segment 1 |                    | Trend segment 2 |                     |
|---------------------------------------|----------------------|-----------------|--------------------|-----------------|---------------------|
|                                       | 2007–2016            | Year            | APC (95% CI)       | Year            | APC (95% CI)        |
| Hepatitis C                           | –0.9 (–1.1 to –0.6)  | 2007–2013       | –0.2 (–0.5 to 0.1) | 2013–2016       | –2.2 (–3.0 to –1.4) |
| Alcoholic liver disease               | –0.1 (–0.1 to 0.0)   |                 |                    |                 |                     |
| Nonalcoholic fatty liver disease      | 4.9 (4.2–5.5)        |                 |                    |                 |                     |
| Hepatitis B                           | –1.0 (–1.5 to –0.5)  |                 |                    |                 |                     |

**Supplementary Table 2.** Annual Trends in the Proportion of HCC-Related Deaths in Patients With Liver-Related Mortality Based on Etiology of Chronic Liver Disease

|                                  | Average APC (95% CI) | Trend segment 1 |                 | Trend segment 2 |                   | Trend segment 3 |                |
|----------------------------------|----------------------|-----------------|-----------------|-----------------|-------------------|-----------------|----------------|
|                                  | 2007–2016            | Year            | APC (95% CI)    | Year            | APC (95% CI)      | Year            | APC (95% CI)   |
| Hepatitis C                      | 5.5 (5.0–6.0)        | 2007–2011       | 6.5 (5.8–7.3)   | 2011–2014       | 1.8 (–0.5 to 4.1) | 2014–2016       | 9.2 (6.8–11.7) |
| Alcoholic liver disease          | 3.7 (2.0–5.3)        |                 |                 |                 |                   |                 |                |
| Nonalcoholic fatty liver disease | 3.7 (–0.4 to 10.8)   |                 |                 |                 |                   |                 |                |
| Hepatitis B                      | 3.7 (1.7–5.8)        | 2007–2010       | 10.0 (3.2–17.2) | 2010–2016       | 0.7 (–1.4 to 2.9) |                 |                |

**Supplementary Table 3.** Age-Standardized HCV-Related Mortality Rate and APC According to Presence of HCC as Underlying Cause of Death in US Adults at Least 20 Years Old in 2007–2016

| HCC as underlying cause of death<br>in subjects with HCV infection (all-cause mortality) | Age-standardized rate |      | Average APC (95% CI) | Trend segment 1 |               | Trend segment 2 |                      |
|------------------------------------------------------------------------------------------|-----------------------|------|----------------------|-----------------|---------------|-----------------|----------------------|
|                                                                                          | 2007                  | 2016 | 2007–2016            | Year            | APC (95% CI)  | Year            | APC (95% CI)         |
| No                                                                                       | 6.48                  | 6.14 | −0.4 (−1.0 to 0.2)   | 2007–2014       | 1.5 (1.1–2.0) | 2014–2016       | −6.9 (−10.0 to −3.7) |
| Yes                                                                                      | 0.69                  | 1.01 | 4.2 (3.2–5.2)        | 2007–2012       | 7.6 (5.9–9.3) | 2012–2016       | 0.1 (−2.0 to 2.4)    |
